# Supplementary material for: Reversible on–off switching of Dy(iii) single-molecule magnets via single-crystal-to-single-crystal transformation
Source: Royal Society of Chemistry journal article supplement (doi:10.1039/d2dt00501h), 2022-01-01
Supplement: d2dt00501h1.pdf [file d2dt00501h1.pdf]

## Supporting Information

### Reversible on-off switching of Dy(III) single-molecule magnets via single-crystal-to-single-crystal transformation

Jing Xi,<sup>a#</sup> Peipei Cen,<sup>b#</sup> Yan Guo,<sup>a#</sup> Yuzhu Li,<sup>a</sup> Yuanyuan Qin,<sup>a</sup> Yi-Quan Zhang,<sup>\*,c</sup>  
Weiming Song,<sup>a</sup> and Xiangyu Liu<sup>\*,a,d</sup>

<sup>a</sup> State Key Laboratory of High-efficiency Utilization of Coal and Green Chemical Engineering, College of Chemistry and Chemical Engineering, Ningxia University, Yinchuan 750021, China

<sup>b</sup> College of Public Health and Management, Ningxia Medical University, Yinchuan 750021, China

<sup>c</sup> Jiangsu Key Laboratory for NSLSCS, School of Physical Science and Technology, Nanjing Normal University, Nanjing 210023, China

<sup>d</sup> State Key Laboratory of Coordination Chemistry, Nanjing University, Nanjing, 210023, China

# These authors contributed equally to this work.

**\*Corresponding author**

**Dr. Xiangyu Liu**

**E-mail: [xiangyuli432@126.com](mailto:xiangyuli432@126.com)**

**Prof. Yi-Quan Zhang**

**[zhangyiquan@njnu.edu.cn](mailto:zhangyiquan@njnu.edu.cn)**

## Contents

- Table S1.** Crystal Data and Structure Refinement Details for **1**, **2**, **2·CH<sub>3</sub>CN**, **2-re** and **2·CH<sub>3</sub>CN-re**.
- Table S2.** Selected bond lengths (Å) and bond angles (°) for **1**, **2**, **2·CH<sub>3</sub>CN**, **2-re** and **2·CH<sub>3</sub>CN-re**.
- Table S3.** Dy (III) ions geometry analysis of **1**, **2** and **2·CH<sub>3</sub>CN** by SHAPE 2.1 software.
- Table S4.** Relaxation fitting parameters from least-squares fitting of  $\chi(f)$  data under 500 Oe dc field of **1**.
- Table S5.** Relaxation fitting parameters from least-squares fitting of  $\chi(f)$  data under 1000 Oe dc field of **2**.
- Table S6.** Relaxation fitting parameters from least-squares fitting of  $\chi(f)$  data under zero dc field of **2·CH<sub>3</sub>CN**.
- Table S7.** Wave functions with definite projection of the total moment  $|m_J\rangle$  for the lowest two KDs of individual Dy<sup>III</sup> fragments for complexes **1**, **2** and **2·CH<sub>3</sub>CN** using CASSCF/RASSI with MOLCAS 8.4.
- Table S8.** Calculated energy levels (cm<sup>-1</sup>), **g** ( $g_x$ ,  $g_y$ ,  $g_z$ ) tensors and predominant  $m_J$  values of the lowest eight Kramers doublets (KDs) of complexes **1**, **2** and **2·CH<sub>3</sub>CN** using CASSCF/RASSI-SO with MOLCAS 8.4.
- Fig. S1** Crystal packing diagram for complex **1**.
- Fig. S2** Crystal packing diagram for complex **2**.
- Fig. S3** Crystal packing diagram for complex **2·CH<sub>3</sub>CN**.
- Fig. S4** Powder XRD patterns for complex **1**.
- Fig. S5**  $M$  vs  $H$  curves for **1** (a), **2** (b) and **2·CH<sub>3</sub>CN** (c) at different temperatures.
- Fig. S6** Temperature dependence of  $\chi'$  and  $\chi''$  susceptibilities for **1** without static field.
- Fig. S7** The  $\chi''$  products for **1** and **2** at 2.0 K under different static fields.
- Fig. S8** Frequency dependence of  $\chi'$  susceptibilities for **1** at applied dc fields of 500 Oe.
- Fig. S9** Cole-Cole plots for **1** at applied dc fields of 500 Oe.
- Fig. S10** Frequency dependence of  $\chi'$  susceptibilities for **2** at applied dc fields of 1000 Oe.
- Fig. S11** Cole-Cole plots for **2** at applied dc fields of 1000 Oe.
- Fig. S12** Temperature dependence of  $\chi'$  and  $\chi''$  susceptibilities for **2-re** without static field.
- Fig. S13** Magnetic hysteresis loops for **1** (a) and **2** (b).
- Fig. S14** Temperature dependence of  $\chi'$  susceptibilities for **2·CH<sub>3</sub>CN** without static field.
- Fig. S15** Frequency dependence of  $\chi'$  susceptibilities for **2·CH<sub>3</sub>CN** without static field.

**Table S1.** Crystal Data and Structure Refinement Details for **1**, **2**, **2·CH<sub>3</sub>CN**, **2-re** and **2·CH<sub>3</sub>CN-re**.

|                                             | <b>1</b>                                                         | <b>2</b>                                                                        | <b>2·CH<sub>3</sub>CN</b>                                                           | <b>2-re</b>                                                                     | <b>2·CH<sub>3</sub>CN-re</b>                                                        |
|---------------------------------------------|------------------------------------------------------------------|---------------------------------------------------------------------------------|-------------------------------------------------------------------------------------|---------------------------------------------------------------------------------|-------------------------------------------------------------------------------------|
| Empirical formula                           | C <sub>14</sub> H <sub>12</sub> Cl <sub>5</sub> DyN <sub>4</sub> | C <sub>32</sub> H <sub>18</sub> Cl <sub>8</sub> DyN <sub>7</sub> O <sub>9</sub> | C <sub>33</sub> H <sub>19.5</sub> Cl <sub>8</sub> DyN <sub>7.5</sub> O <sub>9</sub> | C <sub>32</sub> H <sub>18</sub> Cl <sub>8</sub> DyN <sub>7</sub> O <sub>9</sub> | C <sub>33</sub> H <sub>19.5</sub> Cl <sub>8</sub> DyN <sub>7.5</sub> O <sub>9</sub> |
| Formula weight                              | 576.03                                                           | 1090.63                                                                         | 1111.16                                                                             | 1090.63                                                                         | 1111.16                                                                             |
| Crystal system                              | monoclinic                                                       | monoclinic                                                                      | triclinic                                                                           | monoclinic                                                                      | triclinic                                                                           |
| Space group                                 | <i>Cc</i>                                                        | <i>P2<sub>1</sub>/n</i>                                                         | <i>P-1</i>                                                                          | <i>P2<sub>1</sub>/n</i>                                                         | <i>P-1</i>                                                                          |
| <i>a</i> (Å)                                | 7.1296(4)                                                        | 12.0086(5)                                                                      | 11.2759(7)                                                                          | 12.212(14)                                                                      | 11.511(2)                                                                           |
| <i>b</i> (Å)                                | 21.1133(15)                                                      | 16.5773(7)                                                                      | 13.1435(9)                                                                          | 17.002(19)                                                                      | 13.220(3)                                                                           |
| <i>c</i> (Å)                                | 13.1118(9)                                                       | 20.2262(10)                                                                     | 15.0492(9)                                                                          | 20.87(3)                                                                        | 15.127(3)                                                                           |
| $\alpha$ (°)                                | 90                                                               | 90                                                                              | 85.319(5)                                                                           | 90                                                                              | 81.914(7)                                                                           |
| $\beta$ (°)                                 | 91.917(6)                                                        | 95.797(4)                                                                       | 68.224(6)                                                                           | 95.14(4)                                                                        | 68.257(6)                                                                           |
| $\gamma$ (°)                                | 90                                                               | 90                                                                              | 73.146(6)                                                                           | 90                                                                              | 72.685(6)                                                                           |
| <i>V</i> (Å <sup>3</sup> )                  | 1972.6(2)                                                        | 4005.8(3)                                                                       | 1981.4(2)                                                                           | 4315(9)                                                                         | 2040.2(8)                                                                           |
| <i>Z</i>                                    | 4                                                                | 4                                                                               | 2                                                                                   | 4                                                                               | 2                                                                                   |
| $\mu$ (mm <sup>-1</sup> )                   | 4.469                                                            | 15.423                                                                          | 2.489                                                                               | 2.283                                                                           | 2.417                                                                               |
| Unique reflections                          | 2713                                                             | 7881                                                                            | 9276                                                                                | 9589                                                                            | 9194                                                                                |
| Observed reflections                        | 4168                                                             | 15315                                                                           | 18723                                                                               | 58946                                                                           | 70045                                                                               |
| <i>R</i> <sub>int</sub>                     | 0.0386                                                           | 0.0654                                                                          | 0.0430                                                                              | 0.0601                                                                          | 0.0350                                                                              |
| Final <i>R</i> indices [I > 2 $\sigma$ (I)] | <i>R</i> <sub>1</sub> = 0.0376                                   | <i>R</i> <sub>1</sub> = 0.0905                                                  | <i>R</i> <sub>1</sub> = 0.0475                                                      | <i>R</i> <sub>1</sub> = 0.0602                                                  | <i>R</i> <sub>1</sub> = 0.0256                                                      |
|                                             | w <i>R</i> <sub>2</sub> = 0.0783                                 | w <i>R</i> <sub>2</sub> = 0.1821                                                | w <i>R</i> <sub>2</sub> = 0.0842                                                    | w <i>R</i> <sub>2</sub> = 0.1097                                                | w <i>R</i> <sub>2</sub> = 0.0594                                                    |
| <i>R</i> indices (all data)                 | <i>R</i> <sub>1</sub> = 0.0415                                   | <i>R</i> <sub>1</sub> = 0.1127                                                  | <i>R</i> <sub>1</sub> = 0.0621                                                      | <i>R</i> <sub>1</sub> = 0.0963                                                  | <i>R</i> <sub>1</sub> = 0.0298                                                      |
|                                             | w <i>R</i> <sub>2</sub> = 0.0822                                 | w <i>R</i> <sub>2</sub> = 0.1925                                                | w <i>R</i> <sub>2</sub> = 0.0915                                                    | w <i>R</i> <sub>2</sub> = 0.1262                                                | w <i>R</i> <sub>2</sub> = 0.0619                                                    |

**Table S2.** Selected bond lengths (Å) and bond angles (°) for **1**, **2**, **2·CH<sub>3</sub>CN**, **2-re** and **2·CH<sub>3</sub>CN-re**.

| Complex 1         |            |                   |           |
|-------------------|------------|-------------------|-----------|
| Dy(1)-Cl(3)       | 2.618(4)   | N(3)-Dy(1)-Cl(4)  | 85.7(3)   |
| Dy(1)-Cl(4)       | 2.629(3)   | N(3)-Dy(1)-Cl(5)  | 84.3(3)   |
| Dy(1)-Cl(5)       | 2.603(3)   | N(3)-Dy(1)-N(1)   | 127.7(4)  |
| Dy(1)-N(1)        | 2.609(11)  | N(3)-Dy(1)-N(2)   | 65.6(3)   |
| Dy(1)-N(2)        | 2.480(10)  | N(3)-Dy(1)-N(4)   | 64.9(4)   |
| Dy(1)-N(3)        | 2.464(11)  | N(4)-Dy(1)-Cl(3)  | 83.8(3)   |
| Dy(1)-N(4)        | 2.552(12)  | N(4)-Dy(1)-Cl(4)  | 87.6(2)   |
| Cl(3)-Dy(1)-Cl(4) | 92.53(10)  | N(4)-Dy(1)-Cl(5)  | 89.9(2)   |
| Cl(5)-Dy(1)-Cl(3) | 97.08(10)  | N(4)-Dy(1)- N(1)  | 166.7(4)  |
| Cl(5)-Dy(1)-Cl(4) | 169.75(11) | C(1)-N(1)- Dy(1)  | 125.0(9)  |
| Cl(1)-Dy(1)- N(1) | 87.3(2)    | C(5)-N(1)- Dy(1)  | 117.6(9)  |
| N(1)-Dy(1)-Cl(3)  | 83.7(3)    | C(6)-N(2)- Dy(1)  | 122.1(9)  |
| N(1)-Dy(1)-Cl(4)  | 97.3(2)    | C(7)-N(2)- Dy(1)  | 118.2(7)  |
| N(2)-Dy(1)-Cl(3)  | 144.6(2)   | C(8)-N(3)- Dy(1)  | 119.0(8)  |
| N(2)-Dy(1)-Cl(4)  | 79.1(2)    | C(9)-N(3)- Dy(1)  | 121.2(9)  |
| N(2)-Dy(1)-Cl(5)  | 94.9(2)    | C(10)-N(4)- Dy(1) | 117.8(9)  |
| N(2)-Dy(1)-N(1)   | 63.8(3)    | C(14)-N(4)- Dy(1) | 126.7(9)  |
| N(2)-Dy(1)- N(4)  | 129.5(4)   | C(48)-N(2)- Dy(1) | 122.1(4)  |
| N(3)-Dy(1)-Cl(3)  | 148.6(3)   | C(52)-N(2)- Dy(1) | 120.3(3)  |
| Complex 2         |            |                   |           |
| Dy(1)-O(1)        | 2.171(7)   | O(4)-Dy(1)-N(2)   | 150.2(3)  |
| Dy(1)-O(4)        | 2.175(7)   | O(4)-Dy(1)-N(3)   | 144.2(3)  |
| Dy(1)-O(7)        | 2.180(8)   | O(4)-Dy(1)-N(4)   | 80.9(3)   |
| Dy(1)-N(1)        | 2.531(9)   | O(7)-Dy(1)-N(1)   | 86.8(3)   |
| Dy(1)-N(2)        | 2.486(9)   | O(7)-Dy(1)-N(2)   | 86.2(4)   |
| Dy(1)-N(3)        | 2.479(9)   | O(7)-Dy(1)-N(3)   | 81.9(3)   |
| Dy(1)-N(4)        | 2.558(9)   | O(7)-Dy(1)-N(4)   | 99.4(3)   |
| O(1)-Dy(1)- O(4)  | 98.0(3)    | N(1)-Dy(1)-N(4)   | 165.2(3)  |
| O(1)-Dy(1)- O(7)  | 164.6(3)   | N(2)-Dy(1)-N(1)   | 65.0(3)   |
| O(1)-Dy(1)- N(1)  | 86.3(3)    | N(2)-Dy(1)-N(4)   | 128.4(3)  |
| O(1)-Dy(1)- N(2)  | 78.4(3)    | N(3)-Dy(1)-N(1)   | 129.8(3)  |
| O(1)-Dy(1)- N(3)  | 92.1(3)    | N(3)-Dy(1)-N(2)   | 65.5(3)   |
| O(1)-Dy(1)- N(4)  | 90.6(3)    | N(3)-Dy(1)-N(4)   | 64.7(3)   |
| O(4)-Dy(1)- O(7)  | 95.1(3)    | C(15)-O(1)-Dy(1)  | 178.2(7)  |
| O(4)-Dy(1)- N(1)  | 85.3(3)    | C(21)-O(4)-Dy(1)  | 164.1(15) |

| Complex 2·CH <sub>3</sub> CN |            |                  |            |
|------------------------------|------------|------------------|------------|
| Dy(1)-O(1)                   | 2.201(3)   | O(7)-Dy(1)-N(3)  | 89.25(12)  |
| Dy(1)-O(4)                   | 2.210(3)   | O(7)-Dy(1)-N(4)  | 90.87(12)  |
| Dy(1)-O(7)                   | 2.180(3)   | N(2)-Dy(1)-N(1)  | 65.15(12)  |
| Dy(1)-N(1)                   | 2.549(4)   | N(2)-Dy(1)-N(3)  | 65.11(13)  |
| Dy(1)-N(2)                   | 2.494(4)   | N(2)-Dy(1)-N(4)  | 128.74(13) |
| Dy(1)-N(3)                   | 2.496(4)   | N(3)-Dy(1)-N(1)  | 127.28(12) |
| Dy(1)-N(4)                   | 2.548(4)   | N(3)-Dy(1)-N(4)  | 64.74(12)  |
| O(1)-Dy(1)-O(4)              | 97.51(11)  | N(4)-Dy(1)-N(1)  | 165.41(12) |
| O(1)-Dy(1)- N(1)             | 85.50(12)  | C(15)-O(1)-Dy(1) | 168.2(3)   |
| O(1)-Dy(1)- N(2)             | 148.84(13) | C(21)-O(4)-Dy(1) | 151.4(3)   |
| O(1)-Dy(1)- N(3)             | 145.98(13) | C(27)-O(7)-Dy(1) | 168.2(3)   |
| O(1)-Dy(1)-N(4)              | 81.54(12)  | C(1)-N(1)-Dy(1)  | 125.5(3)   |
| O(4)-Dy(1)-N(1)              | 85.31(11)  | C(5)-N(1)-Dy(1)  | 117.0(3)   |
| O(4)-Dy(1) N(2)              | 90.56(11)  | C(6)-N(2)-Dy(1)  | 120.5(3)   |
| O(4)-Dy(1)-N(3)              | 78.81(12)  | C(7)-N(2)-Dy(1)  | 119.0(3)   |
| O(4)-Dy(1)-N(4)              | 89.76(12)  | C(8)-N(3)-Dy(1)  | 119.2(3)   |
| O(7)-Dy(1)-O(1)              | 95.95(12)  | C(9)-N(3)-Dy(1)  | 121.6(3)   |
| O(7)-Dy(1)-O(4)              | 166.47(12) | C(10)-N(4)-Dy(1) | 118.2(3)   |
| O(7)-Dy(1)-N(1)              | 97.13(12)  | C(14)-N(4)-Dy(1) | 124.8(3)   |
| O(7)-Dy(1)-N(2)              | 78.53(11)  | C(14)-N(4)-C(10) | 116.8(4)   |

| Complex 2-re     |            |                  |            |
|------------------|------------|------------------|------------|
| Dy(1)-O(1)       | 2.218(5)   | O(7)-Dy(1)-N(3)  | 78.59(7)   |
| Dy(1)-O(4)       | 2.218(5)   | O(7)-Dy(1)-N(6)  | 79.1(2)    |
| Dy(1)-O(7)       | 2.206(5)   | O(7)-Dy(1)-N(7)  | 88.24(19)  |
| Dy(1)-N(4)       | 2.596(6)   | N(5)-Dy(1)-N(4)  | 64.0(2)    |
| Dy(1)-N(5)       | 2.548(6)   | N(5)-Dy(1)-N(7)  | 129.6(2)   |
| Dy(1)-N(6)       | 2.529(6)   | N(6)-Dy(1)-N(4)  | 127.6(2)   |
| Dy(1)-N(7)       | 2.577(6)   | N(6)-Dy(1)-N(5)  | 65.0(2)    |
| O(1)-Dy(1)-O(4)  | 95.4(2)    | N(6)-Dy(1)-N(7)  | 65.4(2)    |
| O(1)-Dy(1)- N(4) | 97.7(2)    | N(7)-Dy(1)-N(4)  | 166.37(19) |
| O(1)-Dy(1)- N(5) | 82.25(19)  | C(1)-O(1)-Dy(1)  | 162.0(8)   |
| O(1)-Dy(1)- N(6) | 86.7(2)    | C(7)-O(4)-Dy(1)  | 177.3(9)   |
| O(1)-Dy(1)-N(7)  | 86.62(19)  | C(13)-O(7)-Dy(1) | 177.8(5)   |
| O(4)-Dy(1)-N(4)  | 81.9(2)    | C(19)-N(4)-Dy(1) | 124.3(5)   |
| O(4)-Dy(1) N(5)  | 145.0(2)   | C(23)-N(4)-Dy(1) | 117.9(5)   |
| O(4)-Dy(1)-N(6)  | 150.0(2)   | C(24)-N(5)-Dy(1) | 121.8(5)   |
| O(4)-Dy(1)-N(7)  | 84.8(2)    | C(26)-N(6)-Dy(1) | 118.0(5)   |
| O(7)-Dy(1)-O(1)  | 165.80(19) | C(27)-N(6)-Dy(1) | 119.5(5)   |
| O(7)-Dy(1)-O(4)  | 97.3(2)    | C(28)-N(7)-Dy(1) | 117.7(4)   |
| O(7)-Dy(1)-N(4)  | 90.3(2)    | C(32)-N(7)-Dy(1) | 125.2(5)   |
| O(7)-Dy(1)-N(5)  | 90.9(2)    | C(32)-N(7)-C(28) | 117.1(6)   |

---

**Complex 2·CH<sub>3</sub>CN-re**

---

|                  |            |                  |            |
|------------------|------------|------------------|------------|
| Dy(1)-O(1)       | 2.181(2)   | O(7)-Dy(1)-N(3)  | 78.59(7)   |
| Dy(1)-O(4)       | 2.1910(18) | O(7)-Dy(1)-N(4)  | 89.84(8)   |
| Dy(1)-O(7)       | 2.2135(18) | N(1)-Dy(1)-N(2)  | 64.44(7)   |
| Dy(1)-N(1)       | 2.564(2)   | N(2)-Dy(1)-N(3)  | 65.41(7)   |
| Dy(1)-N(2)       | 2.501(2)   | N(2)-Dy(1)-N(4)  | 129.00(7)  |
| Dy(1)-N(3)       | 2.505(2)   | N(3)-Dy(1)-N(1)  | 126.75(7)  |
| Dy(1)-N(4)       | 2.553(2)   | N(3)-Dy(1)-N(4)  | 64.56(7)   |
| O(1)-Dy(1)-O(4)  | 96.67(8)   | N(4)-Dy(1)-N(1)  | 165.47(7)  |
| O(1)-Dy(1)- O(7) | 164.85(7)  | C(15)-O(1)-Dy(1) | 166.9(2)   |
| O(1)-Dy(1)- N(1) | 98.69(8)   | C(21)-O(4)-Dy(1) | 171.02(18) |
| O(1)-Dy(1)- N(2) | 78.47(8)   | C(27)-O(7)-Dy(1) | 157.2(4)   |
| O(1)-Dy(1)-N(3)  | 87.83(8)   | C(1)-N(1)-Dy(1)  | 125.12(18) |
| O(1)-Dy(1)-N(4)  | 90.37(8)   | C(5)-N(1)-Dy(1)  | 117.54(17) |
| O(4)-Dy(1) O(7)  | 98.36(7)   | C(6)-N(1)-Dy(1)  | 121.48(18) |
| O(4)-Dy(1)-N(1)  | 85.78(7)   | C(7)-N(2)-Dy(1)  | 118.07(17) |
| O(4)-Dy(1)-N(2)  | 148.30(7)  | C(8)-N(3)-Dy(1)  | 118.85(17) |
| O(4)-Dy(1)-N(3)  | 146.21(8)  | C(9)-N(3)-Dy(1)  | 121.18(18) |
| O(4)-Dy(1)-N(4)  | 81.89(7)   | C(10)-N(4)-Dy(1) | 118.10(18) |
| O(7)-Dy(1)-N(1)  | 84.37(7)   | C(14)-N(4)-Dy(1) | 124.75(18) |
| O(7)-Dy(1)-N(2)  | 89.67(7)   | C(14)-N(4)-C(10) | 117.0(2)   |

---

**Table S3.** Dy (III) ions geometry analysis of **1**, **2** and **2·CH<sub>3</sub>CN** by SHAPE 2.1 software.Dy (III) ion geometry analysis of **1**

PBPY-7      3 D5h    Pentagonal bipyramid  
 COC-7      4 C3v    Capped octahedron  
 CTPR-7     5 C2v    Capped trigonal prism  
 JPBPY-7    6 D5h    Johnson pentagonal bipyramid J13  
 JETPY-7    7 C3v    Johnson elongated triangular pyramid J7

Structure [ML7 ]    PBPY-7    COC-7    CTPR-7    JPBPY-7    JETPY-7  
 ABOXIY            ,    1.407,    6.082,    4.636,    5.560,    22.819

Dy (III) ion geometry analysis of **2**

PBPY-7      3 D5h    Pentagonal bipyramid  
 COC-7      4 C3v    Capped octahedron  
 CTPR-7     5 C2v    Capped trigonal prism  
 JPBPY-7    6 D5h    Johnson pentagonal bipyramid J13  
 JETPY-7    7 C3v    Johnson elongated triangular pyramid J7

Structure [ML7 ]    PBPY-7    COC-7    CTPR-7    JPBPY-7    JETPY-7  
 ABOXIY            ,    1.401,    6.090,    4.720,    3.075,    22.753

Dy (III) ion geometry analysis of **2·CH<sub>3</sub>CN**

PBPY-7      3 D5h    Pentagonal bipyramid  
 COC-7      4 C3v    Capped octahedron  
 CTPR-7     5 C2v    Capped trigonal prism  
 JPBPY-7    6 D5h    Johnson pentagonal bipyramid J13  
 JETPY-7    7 C3v    Johnson elongated triangular pyramid J7

Structure [ML7 ]    PBPY-7    COC-7    CTPR-7    JPBPY-7    JETPY-7  
 ABOXIY            ,    1.431,    6.046,    4.848,    3.238,    22.405

| Configuration                                                     | ABOXIY, <b>1</b> | ABOXIY, <b>2</b> | ABOXIY, <b>2·CH<sub>3</sub>CN</b> |
|-------------------------------------------------------------------|------------------|------------------|-----------------------------------|
| Pentagonal bipyramid ( <i>D<sub>5h</sub></i> )                    | <b>1.407</b>     | <b>1.401</b>     | <b>1.431</b>                      |
| Capped octahedron ( <i>C<sub>3v</sub></i> )                       | 6.082            | 6.096            | 6.046                             |
| Capped trigonal prism ( <i>C<sub>2v</sub></i> )                   | 4.636            | 4.720            | 4.848                             |
| Johnson pentagonal bipyramid J13 ( <i>D<sub>5h</sub></i> )        | 5.560            | 3.075            | 3.238                             |
| Johnson elongated triangular pyramid J7 ( <i>C<sub>3v</sub></i> ) | 22.819           | 22.753           | 22.405                            |

**Table S4.** Relaxation fitting parameters from least-squares fitting of  $\chi(f)$  data under 500 Oe dc field of 1.

| $T(K)$ | $\chi_T$ | $\chi_s$ | $\alpha$ |
|--------|----------|----------|----------|
| 2.0    | 2.775    | 1.278    | 0.135    |
| 2.2    | 2.596    | 1.177    | 0.130    |
| 2.4    | 2.439    | 1.093    | 0.121    |
| 2.6    | 2.293    | 1.002    | 0.120    |
| 2.8    | 2.161    | 0.845    | 0.134    |
| 3.0    | 2.045    | 0.112    | 0.187    |
| 3.2    | 1.934    | 0.020    | 0.157    |
| 3.4    | 1.836    | 0.035    | 0.163    |
| 3.6    | 1.746    | 0.051    | 0.159    |

**Table S5.** Relaxation fitting parameters from least-squares fitting of  $\chi(f)$  data under 1000 Oe dc field of 2.

| $T(K)$ | $\chi_T$ | $\chi_s$ | $\alpha$ |
|--------|----------|----------|----------|
| 2.0    | 5.599    | 0.127    | 0.625    |
| 2.5    | 3.486    | 0.252    | 0.489    |
| 3.0    | 2.794    | 0.293    | 0.436    |
| 3.5    | 2.269    | 0.383    | 0.313    |
| 4.0    | 1.937    | 0.403    | 0.213    |
| 4.5    | 1.709    | 0.383    | 0.154    |
| 5.0    | 1.539    | 0.355    | 0.118    |
| 5.5    | 1.400    | 0.332    | 0.088    |
| 6.0    | 1.283    | 0.312    | 0.069    |
| 6.5    | 1.186    | 0.293    | 0.058    |
| 7.0    | 1.102    | 0.280    | 0.046    |
| 7.5    | 1.029    | 0.267    | 0.039    |
| 8.0    | 0.966    | 0.256    | 0.034    |
| 8.5    | 0.909    | 0.247    | 0.027    |
| 9.0    | 0.859    | 0.235    | 0.023    |
| 9.5    | 0.816    | 0.208    | 0.032    |



**Table S6.** Relaxation fitting parameters from least-squares fitting of  $\chi(f)$  data under zero dc field of  $2\cdot\text{CH}_3\text{CN}$ .

| $T(\text{K})$ | $\chi_T$ | $\chi_s$ | $\alpha$ |
|---------------|----------|----------|----------|
| 3.0           | 2.294    | 0.129    | 0.184    |
| 4.0           | 1.715    | 0.104    | 0.182    |
| 5.0           | 1.370    | 0.087    | 0.181    |
| 6.0           | 1.140    | 0.076    | 0.178    |
| 6.5           | 1.051    | 0.072    | 0.175    |
| 7.0           | 0.976    | 0.069    | 0.171    |
| 7.5           | 0.910    | 0.066    | 0.165    |
| 8.0           | 0.853    | 0.064    | 0.159    |
| 8.5           | 0.802    | 0.062    | 0.151    |
| 9.0           | 0.757    | 0.061    | 0.142    |
| 9.5           | 0.716    | 0.060    | 0.132    |
| 10.0          | 0.680    | 0.059    | 0.121    |
| 10.5          | 0.647    | 0.058    | 0.110    |
| 11.0          | 0.618    | 0.057    | 0.100    |
| 11.5          | 0.590    | 0.056    | 0.089    |
| 12.0          | 0.565    | 0.055    | 0.079    |
| 12.5          | 0.542    | 0.054    | 0.070    |
| 13.0          | 0.521    | 0.053    | 0.061    |
| 13.5          | 0.502    | 0.053    | 0.053    |
| 14.0          | 0.484    | 0.052    | 0.046    |
| 15.0          | 0.452    | 0.051    | 0.034    |
| 16.5          | 0.425    | 0.051    | 0.025    |
| 17.0          | 0.400    | 0.050    | 0.019    |
| 18.0          | 0.378    | 0.049    | 0.015    |

**Table S7.** Wave functions with definite projection of the total moment  $|m_J\rangle$  for the lowest two KDs of individual  $\text{Dy}^{\text{III}}$  fragments for complexes **1**, **2** and  $2\cdot\text{CH}_3\text{CN}$  using CASSCF/RASSI with MOLCAS 8.4.

|                           | $E$   | wave functions                                                                                                                                    |
|---------------------------|-------|---------------------------------------------------------------------------------------------------------------------------------------------------|
| <b>1</b>                  | 0.0   | 95.4% $ \pm 15/2\rangle$                                                                                                                          |
|                           | 71.5  | 34.3% $ \pm 1/2\rangle$ +24.3% $ \pm 3/2\rangle$ +16.7% $ \pm 5/2\rangle$ +8.6% $ \pm 7/2\rangle$ +5.7% $ \pm 9/2\rangle$                         |
| <b>2</b>                  | 0.0   | 98.7% $ \pm 15/2\rangle$                                                                                                                          |
|                           | 163.1 | 37.5% $ \pm 1/2\rangle$ +25.5% $ \pm 3/2\rangle$ +15.8% $ \pm 5/2\rangle$ +7.4% $ \pm 7/2\rangle$ +5.4% $ \pm 13/2\rangle$                        |
| <b>2·CH<sub>3</sub>CN</b> | 0.0   | 98.8% $ \pm 15/2\rangle$                                                                                                                          |
|                           | 224.7 | 27.1% $ \pm 1/2\rangle$ +21% $ \pm 13/2\rangle$ +18.4% $ \pm 3/2\rangle$ +14.1% $ \pm 5/2\rangle$ +7.6% $ \pm 7/2\rangle$ +6.9% $ \pm 9/2\rangle$ |

**Table S8.** Calculated energy levels ( $\text{cm}^{-1}$ ),  $\mathbf{g}$  ( $g_x, g_y, g_z$ ) tensors and predominant  $m_J$  values of the lowest eight Kramers doublets (KDs) of complexes **1**, **2** and **2**·**CH<sub>3</sub>CN** using CASSCF/RASSI-SO with MOLCAS 8.4.

| KDs | <b>1</b> |              |            | <b>2</b> |              |            | <b>2</b> · <b>CH<sub>3</sub>CN</b> |              |            |
|-----|----------|--------------|------------|----------|--------------|------------|------------------------------------|--------------|------------|
|     | $E$      | $\mathbf{g}$ | $m_J$      | $E$      | $\mathbf{g}$ | $m_J$      | $E$                                | $\mathbf{g}$ | $m_J$      |
| 1   | 0.0      | 0.268        | $\pm 15/2$ | 0.0      | 0.082        | $\pm 15/2$ | 0.0                                | 0.051        | $\pm 15/2$ |
|     |          | 0.810        |            |          | 0.180        |            |                                    | 0.097        |            |
|     |          | 19.233       |            |          | 19.725       |            |                                    | 19.759       |            |
| 2   | 71.5     | 0.256        | $\pm 1/2$  | 163.1    | 0.772        | $\pm 1/2$  | 224.7                              | 1.355        | $\pm 9/2$  |
|     |          | 0.956        |            |          | 0.872        |            |                                    | 2.941        |            |
|     |          | 18.186       |            |          | 18.756       |            |                                    | 16.613       |            |
| 3   | 205.3    | 3.579        | $\pm 13/2$ | 306.6    | 1.852        | $\pm 13/2$ | 318.4                              | 0.279        | $\pm 13/2$ |
|     |          | 4.515        |            |          | 2.767        |            |                                    | 3.290        |            |
|     |          | 11.867       |            |          | 13.965       |            |                                    | 11.813       |            |
| 4   | 271.2    | 9.311        | $\pm 7/2$  | 422.4    | 1.355        | $\pm 5/2$  | 467.2                              | 9.083        | $\pm 11/2$ |
|     |          | 6.632        |            |          | 5.369        |            |                                    | 6.522        |            |
|     |          | 0.762        |            |          | 11.546       |            |                                    | 3.550        |            |
| 5   | 303.2    | 2.303        | $\pm 9/2$  | 479.0    | 3.073        | $\pm 11/2$ | 527.2                              | 0.946        | $\pm 5/2$  |
|     |          | 5.119        |            |          | 5.028        |            |                                    | 4.249        |            |
|     |          | 12.719       |            |          | 12.667       |            |                                    | 14.000       |            |
| 6   | 322.8    | 0.215        | $\pm 11/2$ | 513.6    | 0.542        | $\pm 9/2$  | 574.1                              | 0.703        | $\pm 3/2$  |
|     |          | 1.118        |            |          | 1.547        |            |                                    | 2.763        |            |
|     |          | 14.030       |            |          | 15.155       |            |                                    | 14.387       |            |
| 7   | 379.9    | 0.449        | $\pm 5/2$  | 567.4    | 0.843        | $\pm 3/2$  | 632.4                              | 0.874        | $\pm 1/2$  |
|     |          | 0.732        |            |          | 1.444        |            |                                    | 1.400        |            |
|     |          | 14.587       |            |          | 14.647       |            |                                    | 15.849       |            |
| 8   | 453.1    | 0.118        | $\pm 3/2$  | 641.9    | 0.499        | $\pm 7/2$  | 708.9                              | 0.271        | $\pm 7/2$  |
|     |          | 0.271        |            |          | 0.772        |            |                                    | 0.625        |            |
|     |          | 18.258       |            |          | 17.910       |            |                                    | 18.048       |            |

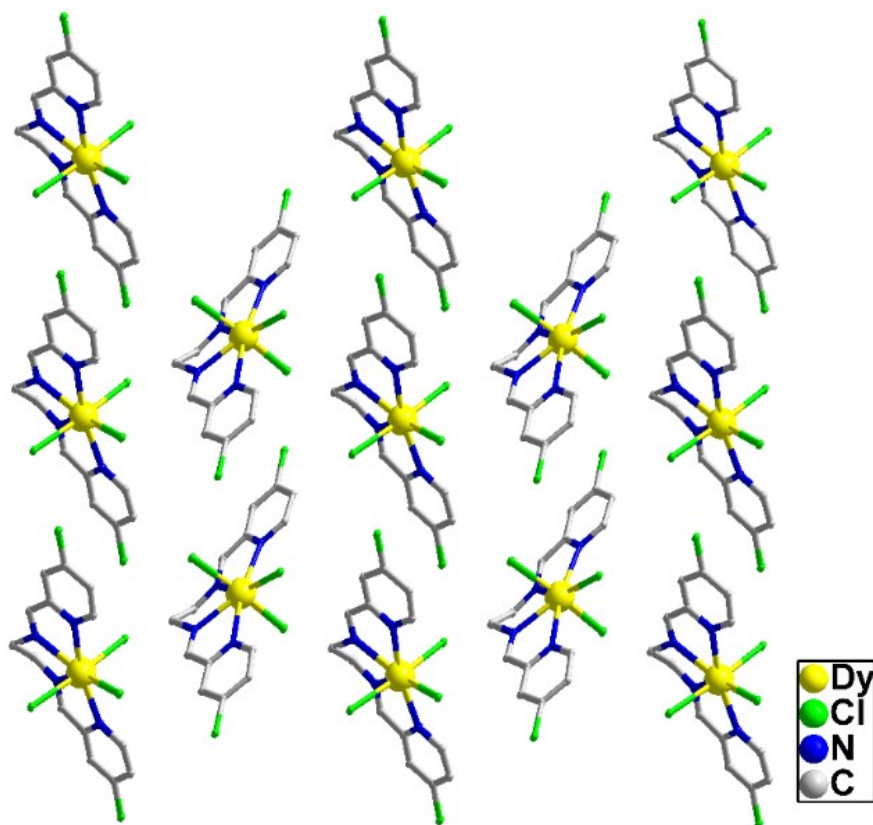

Fig. S1 Crystal packing diagram for complex 1.

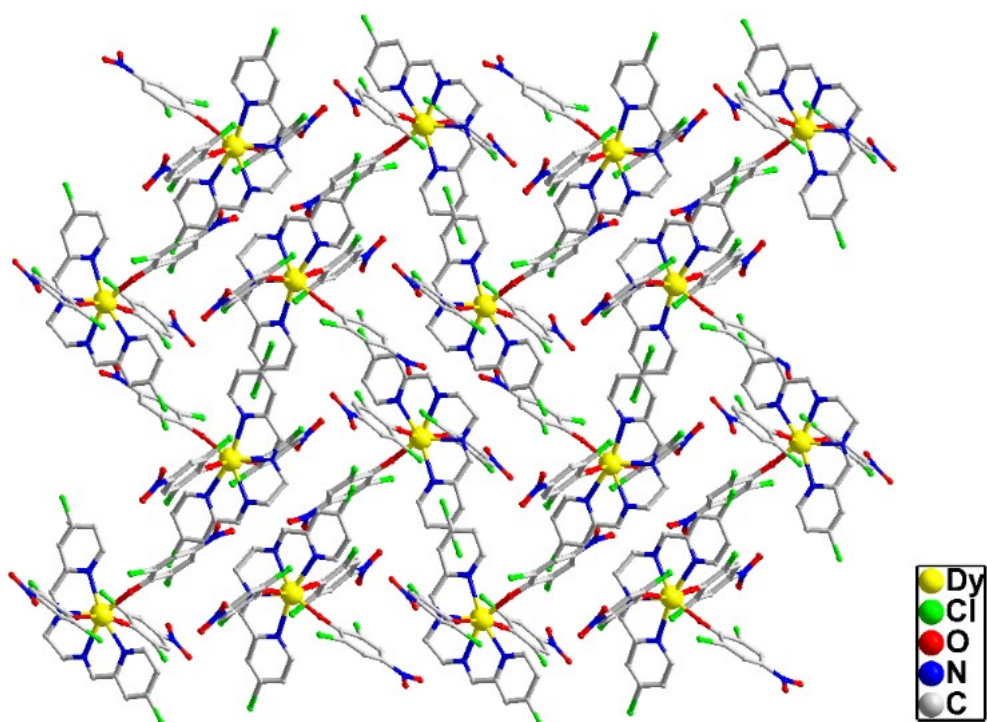

Fig. S2 Crystal packing diagram for complex 2.

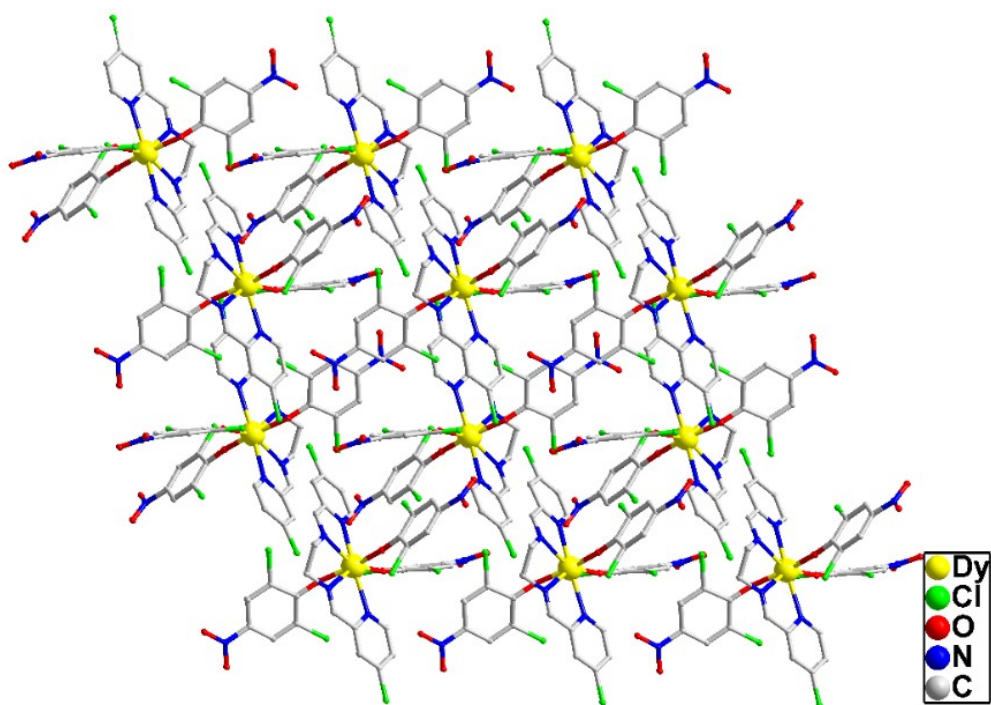

Fig. S3 Crystal packing diagram for complex 2·CH<sub>3</sub>CN.

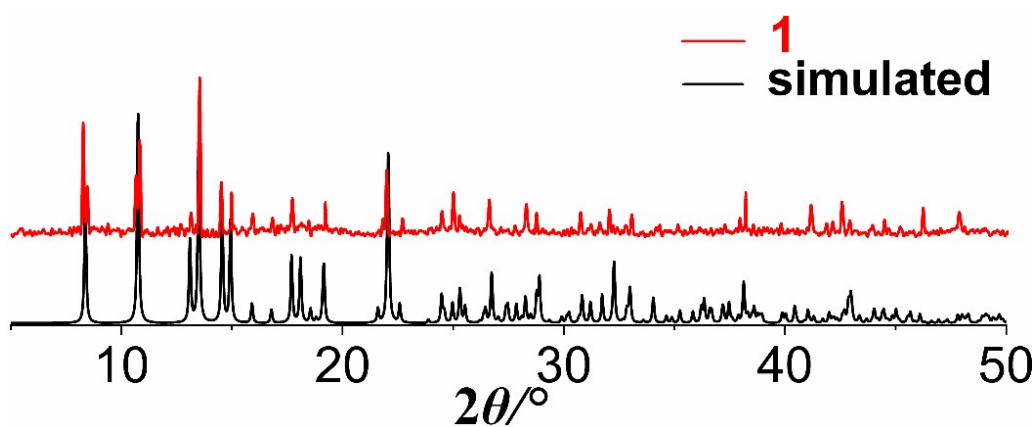

Fig. S4 Powder XRD patterns for complex 1.

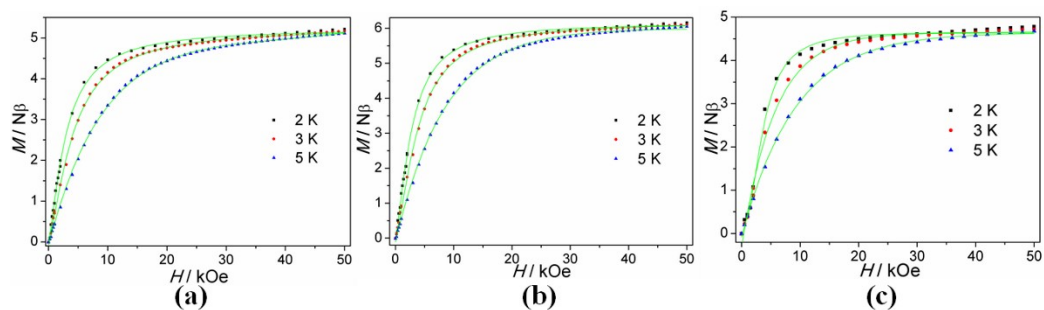

Fig. S5  $M$  vs  $H$  curves for 1 (a), 2 (b) and 2·CH<sub>3</sub>CN (c) at different temperatures. Solid lines represent the simulation from *ab initio* calculation.

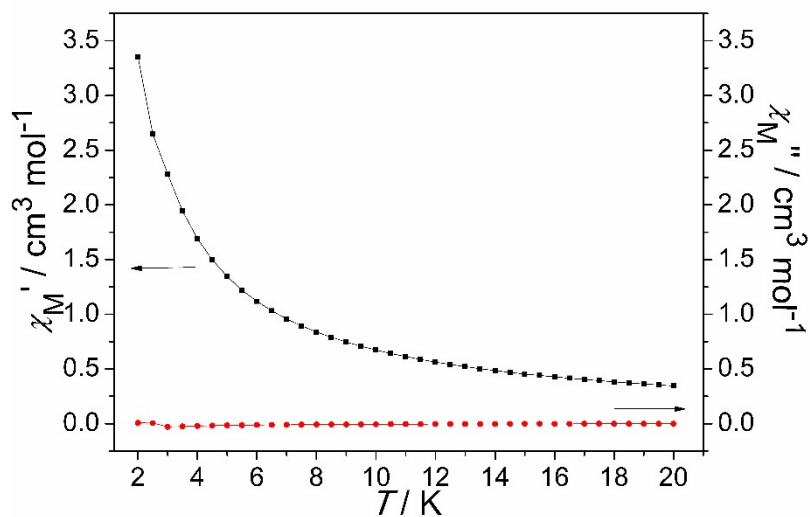

Fig. S6 Temperature dependence of  $\chi'$  and  $\chi''$  susceptibilities for **1** without static field.

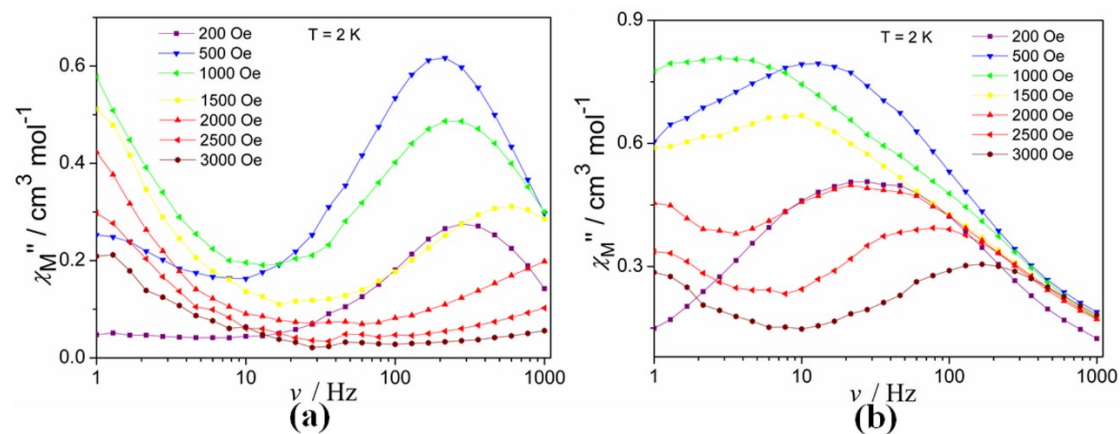

Fig. S7 The  $\chi''$  products for **1** and **2** at 2.0 K under different static fields

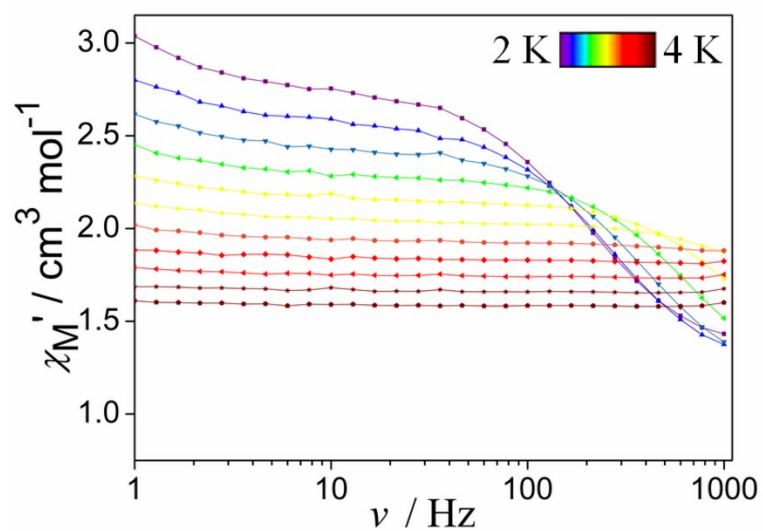

Fig. S8 Frequency dependence of  $\chi'$  susceptibilities for **1** at applied dc fields of 500 Oe.

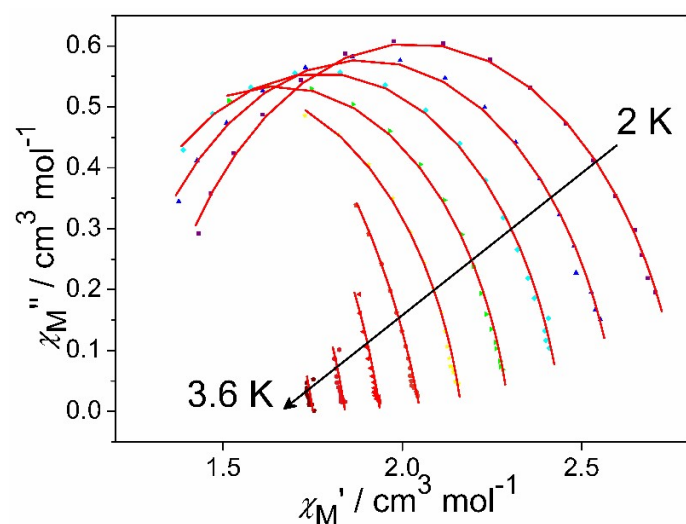

**Fig. S9** Cole-Cole plots for **1** at applied dc fields of 500 Oe. The solid lines represent the best fit to the measured results.

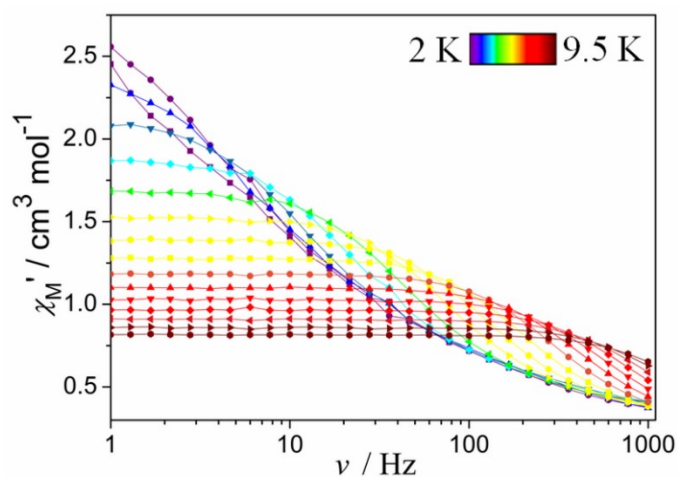

**Fig. S10** Frequency dependence of  $\chi'$  susceptibilities for **2** at applied dc fields of 1000 Oe.

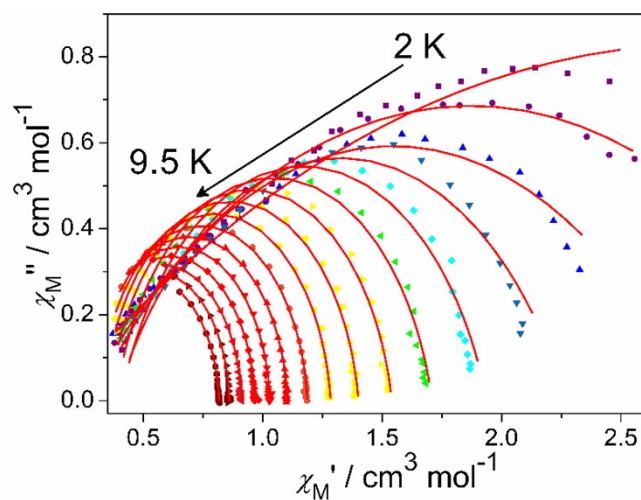

**Fig. S11** Cole-Cole plots for **2** at applied dc fields of 1000 Oe. The solid lines represent the best fit to the measured results

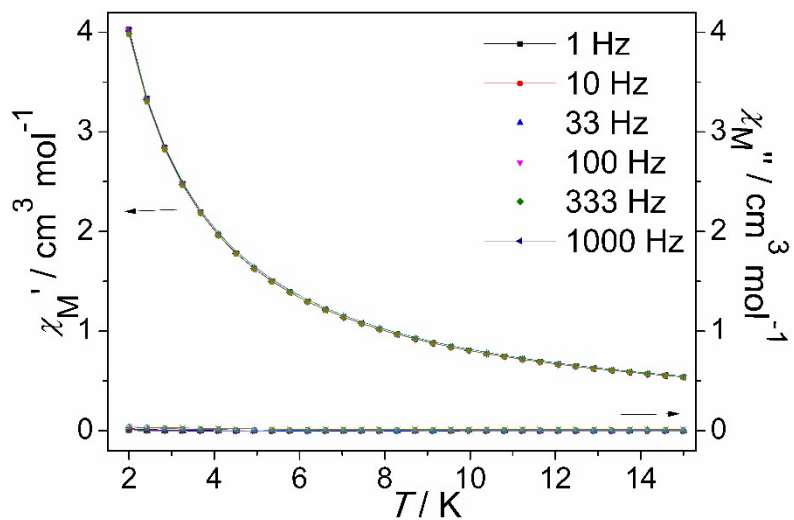

Fig. S12 Temperature dependence of  $\chi'$  and  $\chi''$  susceptibilities for **2-re** without static field.

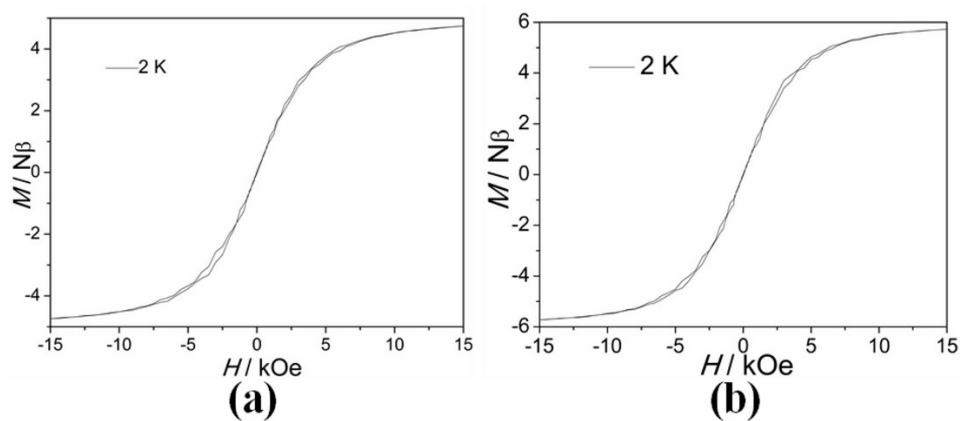

Fig. S13 Magnetic hysteresis loops for **1** (a) and **2** (b).

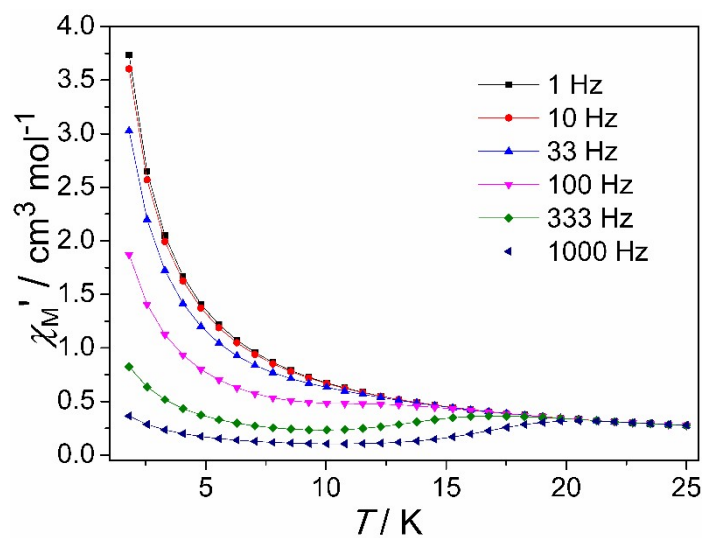

Fig. S14 Temperature dependence of  $\chi''$  susceptibilities for **2·CH<sub>3</sub>CN** without static field.

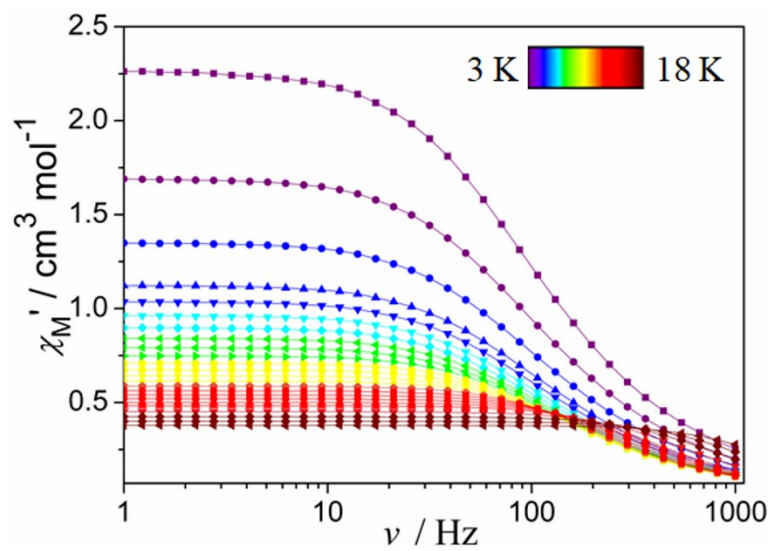

Fig. S15 Frequency dependence of  $\chi'$  susceptibilities for  $2 \cdot \text{CH}_3\text{CN}$  without static field.
